1 Title:

2 Allometric scaling strengthens the relationship between eDNA particle concentration and  
3 organism abundance in nature

4

5 Running title:

6 Allometry and eDNA particle concentration

7

8 Authors:

9 Yates, M.C.\*<sup>a</sup>, Glaser, D.<sup>b</sup>, Post, J.<sup>b</sup>, Cristescu, M.E.<sup>c</sup>, Fraser, D.J.<sup>d</sup>, and Derry, A.M.<sup>a</sup>

10 <sup>a</sup>Université du Québec à Montréal, 201 avenue Président-Kennedy, Montréal, Québec, H2X 3Y7

11 <sup>b</sup>University of Calgary, 507 Campus Dr NW, Calgary, Alberta, T2N 4V8

12 <sup>c</sup>McGill University, 1205 Dr Penfield Ave, Montreal, Quebec, H3A 1B1

13 <sup>d</sup>Concordia University, 7141 Sherbrooke St W, Montreal, Quebec, H4B 1R6

14 \*Corresponding author: [matthew.yates@outlook.com](mailto:matthew.yates@outlook.com) (514-919-5613)

15

16

17 **Abstract**

18 *Organism abundance is a critical parameter in ecology, but its estimation is often challenging.*  
19 *Approaches utilizing eDNA to indirectly estimate abundance have recently generated substantial*  
20 *interest. However, preliminary correlations observed between eDNA concentration and*  
21 *abundance in nature are typically moderate in strength with significant unexplained variation.*  
22 *Here we apply a novel approach to integrate allometric scaling coefficients into models of eDNA*  
23 *concentration and organism abundance. We hypothesize that eDNA particle production scales*  
24 *non-linearly with mass, with scaling coefficients  $< 1$ . Wild populations often exhibit substantial*  
25 *variation in individual body size distributions; we therefore predict that the distribution of mass*  
26 *across individuals within a population will influence population-level eDNA production rates. To*  
27 *test our hypothesis, we collected standardized body size distribution and mark-recapture*  
28 *abundance data using whole-lake experiments involving nine populations of brook trout. We*  
29 *correlated eDNA concentration with three metrics of abundance: density (individuals/ha),*  
30 *biomass (kg/ha), and allometrically scaled mass (ASM) ( $\sum(\text{individual mass}^{0.73})/\text{ha}$ ). Density and*  
31 *biomass were both significantly positively correlated with eDNA concentration (adj.  $R^2 = 0.59$*   
32 *and 0.63, respectively), but ASM exhibited improved model fit (adj.  $R^2 = 0.78$ ). We also*  
33 *demonstrate how estimates of ASM derived from eDNA samples in ‘unknown’ systems can be*  
34 *converted to biomass or density estimates with additional size structure data. Future experiments*  
35 *should empirically validate allometric scaling coefficients for eDNA production, particularly*  
36 *where substantial intraspecific size distribution variation exists. Incorporating allometric scaling*  
37 *may improve predictive models to the extent that eDNA concentration may become a reliable*  
38 *indicator of abundance in nature.*

39

40 Keywords:

41 environmental DNA, eDNA, Abundance, Density, Biomass, Allometry, Allometric scaling

## 42 **Introduction**

43           Developing methods to estimate animal abundance in nature has attracted the attention of  
44 researchers and managers alike for over a century (Schwarz & Seber, 1999). Abundance is a  
45 fundamental population parameter in ecology, conservation, and natural resource management  
46 (Luikart, Ryman, Tallmon, Schwartz, & Allendorf, 2010), with direct impacts on ecological  
47 interactions (Krebs, 2009), ecosystem functioning (Schaus et al., 2010), population persistence  
48 and adaptability (Jamieson & Allendorf, 2012), as well as ecosystem services/resources (Immell  
49 & Anthony, 2008; Schwarz & Seber, 1999). Methodologies to estimate animal abundance  
50 represent a well-developed field of empirical research in ecology that has progressed remarkably  
51 (Schwarz & Seber, 1999; Seber, 1986). Yet despite this success, the estimation of abundance in  
52 nature is often challenging; obtaining robust estimates in natural populations using traditional  
53 methods can be time-consuming, costly, labor intensive, or even impossible to obtain for some  
54 populations (Luikart et al., 2010; Ovenden et al., 2016; Yates, Bernos, & Fraser, 2017).

55           The recent development of novel molecular tools has renewed interest in utilizing genetic  
56 information to indirectly estimate abundance in difficult-to-sample natural populations  
57 (Goldberg, Strickler, & Pilliod, 2015; Luikart et al., 2010). Molecular techniques that quantify  
58 the concentration of environmental DNA (eDNA) particles represent a promising tool, with  
59 recent studies demonstrating support for a correlation between eDNA concentration and  
60 abundance (Pilliod, Goldberg, Arkle, & Waits, 2013; Takahara, Minamoto, Yamanaka, Doi, &  
61 Kawabata, 2012; Thomsen et al., 2012). For example, laboratory studies have demonstrated a  
62 strong correlation between eDNA concentration and abundance (Eichmiller, Miller, & Sorensen,  
63 2016; Klymus, Richter, Chapman, & Paukert, 2015), exhibiting a mean correlation coefficient of  
64 0.9 ( $R^2 = 0.81$ ) (Yates, Fraser, & Derry, 2019). Studies in nature, however, have generally found

65 weaker correlations than laboratory studies, with a mean correlation coefficient of 0.71-0.75 ( $R^2$   
66 = 0.51-0.57) (Yates et al., 2019). Although correlations remain moderately strong in nature,  
67 much of the variation in eDNA particle concentration across environments often remains  
68 unexplained. As a result, the extent to which eDNA could be used to reliably infer abundance in  
69 nature remains limited without significant improvements in modelling or technology.

70 In nature, organismal abundance is typically quantified by evaluating individual density  
71 (i.e. individuals/unit area) or biomass density (i.e. kg/unit area). While both metrics of abundance  
72 appear to correlate equally well with species-specific eDNA particle concentration in the wild,  
73 processes involved in the production of eDNA particles in natural environments are unlikely to  
74 scale linearly with either biomass or density. Although eDNA production tends to increase with  
75 individual mass (Maruyama, Nakamura, Yamanaka, Kondoh, & Minamoto, 2014), individuals  
76 with a large biomass often produce fewer eDNA particles than equivalent biomass of smaller  
77 conspecifics (Maruyama et al., 2014; Mizumoto, Urabe, Kanbe, Fukushima, & Araki, 2017;  
78 Takeuchi, Iijima, Kakuzen, Watanab, & Yamada, 2019). As such, eDNA particle concentration  
79 would be expected to vary, for example, between environments that contain equal densities of  
80 individuals but with varying biomass. Similarly, environments with equal biomass but varying  
81 densities would also be likely to vary in observed eDNA particle concentration. Wild populations  
82 often exhibit substantial inter-population variation in the distribution of individual biomass  
83 (Donald, Anderson, Mayhood, Anderson, & Correlations, 1980; Guernon, Yates, Fraser, &  
84 Derry, 2018; Millien et al., 2006; Sebens, 1987), which may in turn scale to affect overall  
85 population-level rates of eDNA production (Maruyama et al., 2014) and partially account for the  
86 substantial unexplained variation observed between eDNA concentration and traditional metrics  
87 of abundance (e.g. density and biomass) in nature (Yates et al., 2019).

88           Here, we extend models of physiological allometric scaling to organismal eDNA particle  
89 production to provide a framework through which differences in density, total biomass, and the  
90 distribution of individual biomass can be integrated into models of eDNA production in natural  
91 populations. Excretory processes (urine, fecal matter, etc.) and shedding (from scales, skin,  
92 mucous, etc.) are thought to be the two major physiological processes that contribute to the  
93 production of eDNA particles (Jo, Murakami, Yamamoto, Masuda, & Minamoto, 2019; Stewart,  
94 2019). The metabolic theory of ecology (MTE) provides a robust, empirically validated  
95 framework through which allometry in metabolic processes (including excretion) can be  
96 modelled. The MTE posits that metabolic processes scale non-linearly with body size according  
97 to the power function:

$$98 \qquad I = I_0 * M^b$$

99 where  $I$  = metabolic rate,  $I_0$  = a normalization constant,  $M$  = organism body mass, and  $b$  = an  
100 allometric scaling coefficient (Allegier, Wenger, Rosemond, Schindler, & Layman, 2015;  
101 Brown, Gillooly, Allen, Savage, & West, 2004; Vanni & McIntyre, 2016). The value of  $b$  varies  
102 depending on the physiological process; metabolic rates typically scale to the power of 0.75  
103 (Brown et al., 2004; Isaac & Carbone, 2010), whereas values for consumptive or excretory rates  
104 are often lower (Post, Parkinson, & Johnston, 1999; Vanni & McIntyre, 2016). Nevertheless,  
105 metabolic theory predicts that larger organisms tend to exhibit disproportionately lower rates  
106 (relative to their mass) for metabolically linked processes such as excretion (Allen & Gillooly,  
107 2009; Vanni & McIntyre, 2016). While shedding from mucous, scales, or skin may also be  
108 linked to metabolic rates, shedding rates are also likely a function of the surface area of an  
109 organism. In many aquatic organisms (particularly fish) the allometric relationship between body  
110 mass and surface area follows a similar mathematical form as metabolic processes; salmonids,

111 for example, exhibit mass-scaling coefficients for surface area between 0.59 and 0.65 (Shea,  
112 Fryer, Pert, & Bricknell, 2006).

113       Metabolic rates, excretory rates, and surface area (via shedding) are likely to collectively  
114 impact eDNA production, yet all follow a similar allometric form; as a result, we hypothesize  
115 that eDNA production can also be modelled as a power function of individual mass and an  
116 exponential scaling coefficient with a value less than 1. This hypothesis has important  
117 consequences for ecosystem-level processes; the utility of integrating allometric scaling in  
118 ecosystem-level models of ecological stoichiometry (Allen & Gillooly, 2009), animal excretion  
119 (Vanni & McIntyre, 2016), consumption (Post et al., 1999), and nutrient cycling (Schaus et al.,  
120 2010; Schindler & Eby, 1997), for example, has long been acknowledged with broad empirical  
121 support. We therefore further hypothesize that, when scaled to the level of an entire population,  
122 allometric scaling in eDNA production will also have a substantial effect on overall population-  
123 level production of eDNA. We consequently predict that the incorporation of mass scaling  
124 coefficients to account for inter-population variation in density, biomass, and the distribution of  
125 biomass across individuals will improve modelling efforts linking eDNA particle concentration  
126 and abundance across natural ecosystems.

127       To test our hypothesis, we collected standardized individual biomass data and used  
128 classic mark-recapture experiments to enumerate abundance in nine populations of brook trout in  
129 the Rocky Mountains of Canada while simultaneously collecting eDNA samples in each lake.  
130 Study populations exhibited substantial variation in individual density (63 - 1177 individuals/ha),  
131 biomass density (12.6 - 52.4 kg/ha), and mean body size (43.0 - 405.9 g/individual). We applied  
132 these data to specifically test two key predictions: i) brook trout eDNA particle concentration  
133 will correlate with traditional metrics of abundance (density and biomass) across the nine study

134 lakes; and ii) incorporating allometric scaling coefficients to estimates of brook trout abundance  
135 (e.g.  $\sum(\text{individual biomass}^{0.73})/\text{ha}$ , or “allometrically scaled mass” (ASM)) will substantially  
136 improve models of abundance and eDNA particle concentration.

137         ASM estimates derived from known eDNA concentrations in novel systems lacking  
138 abundance data cannot be directly converted to traditional metrics of abundance (e.g. density and  
139 biomass) because multiple density/biomass configurations (e.g. many small fish or a small  
140 number of large fish) can produce equivalent ASM values. However, using a real-world  
141 example, we also demonstrate how ASM estimates derived from known eDNA concentrations  
142 for systems that lack abundance data on a target species can be converted into traditional  
143 estimates of abundance with additional size structure data.



## 144 **Materials and Methods**

### 145 *Study species and system*

146           Nine brook trout populations introduced in the early 20<sup>th</sup> century to lakes located in  
147 Kootenay, Banff, and Yoho national parks (Figure S1) were monitored to determine population  
148 size (number of individuals > 80mm) and individual biomass distributions. Study populations  
149 experience little recreational fishing pressure due to no-take policies implemented within the  
150 National Parks.

151

### 152 *Mark-recapture surveys and size structure estimates*

153           Mark-recapture studies were conducted in 2018 between May 27<sup>th</sup> and June 30<sup>th</sup>, except  
154 for Cobb lake where isolated marking events occurred until September 12<sup>th</sup> (Figure S2). Fish  
155 were captured using a combination of fyke nets, angling, and backpack electrofishing (Table 1).  
156 Large (1 m hoop diameter, 2 cm mesh) and small (0.7 m hoop diameter and 0.8 cm mesh) fyke  
157 nets were distributed around the perimeter of lakes with the lead attached to shore and the end of  
158 the trap facing the center of the lake. Nets were checked daily to reduce stress to fish and  
159 possible cannibalism. Angling was used to supplement fish capture efforts at sites where fyke  
160 catchability was low (predominantly Cobb). Marks were also assigned to fish captured by  
161 electrofishing the shore and inlets/outlets of lakes with a backpack electrofisher (Smith-Root,  
162 Vancouver, Washington, USA)

163           Captured fish were anesthetized using clove oil and measured for fork length ( $\pm$  1mm)  
164 and mass ( $\pm$  0.1g). Any unmarked fish were gastrically tagged with a BioMark HPT8 pre-loaded  
165 Passive Integrated Transponder (PIT) tag (Boise, Idaho, USA). Only fish greater than or equal to  
166 80 mm were tagged to reduce tagging mortality. The tag number of any recaptured fish was

167 recorded. All fish were processed in the shade with aerators to avoid unnecessary stress.  
168 Recovered fish were released in the center of the lake to standardize release location and  
169 promote mixing (e.g. if released near shore, fish may have been recaptured in an adjacent net,  
170 biasing mark recapture data). Marking ceased once recapture ratios approached twenty five  
171 percent for several consecutive days.

172         Size structure estimates aimed to obtain a representative snapshot of the size structure of  
173 each population and was conducted between July 27<sup>th</sup> and September 1<sup>st</sup>, with the exception of  
174 Cobb where size structure assessments continued to October 12<sup>th</sup> (Figure S2). Fish were captured  
175 in large and small sinking mixed mesh gillnets with clear monofilament. Large mixed-mesh  
176 gillnets were 15.6 m long, 1.8 m deep and had an equal area of 64-51-89-38-76 mm mesh panels.  
177 Small mixed-mesh gillnets were 12.5 meters long, 1.8 meters deep, and consisted of an equal  
178 area of 32-19-38-13-25 mm mesh panels. Index nets are widely used in North America for size  
179 structure assessments (Bonar, Hubert, & Willis, 2009; Hubert, Pope, & Dettmers, 2012; Johnson,  
180 1983; Post et al., 1999; Ward, Askey, Post, Varkey, & Mcallister, 2012) as these attempt to  
181 capture a representative size/age structure of the population (Morgan, 2002). Nets were checked  
182 daily and moved if they were being reset. Sampling ceased when approximately five to ten  
183 percent of the population was captured, apart from Cobb lake where size structure assessment  
184 captured approximately 71% of individuals (Table 1). Captured fish were euthanized with clove  
185 oil, PIT tags were recorded, and length/mass data were collected as described for the marking  
186 period.

187

188 *Population size estimation*

189 Schnabel population size estimates, which utilize sequential marking/recapture events,  
190 were used to determine the number of fish in a lake (Schnabel, 1938). All size structure  
191 assessment removals were pooled together into one final sampling event for the population  
192 estimates which controlled for the removal of marks at large ( $M$ ). Note that population estimates  
193 only account for fish greater the minimum tagging size (80 mm fork length). All population  
194 estimates were conducted in R (R Development Core Team, 2017) with the *mrClosed* function  
195 from the Fisheries Stock Assessment package FSA (Ogle, 2016). Confidence intervals for  
196 Schnabel population estimates followed recommendations from (Seber, 2002) as implemented in  
197 the FSA package.

198 *Density calculation*

199 To link eDNA particle concentration with fish abundance, three metrics of density were  
200 calculated: (i) individual density (individuals/ha); (ii) biomass density (biomass/ha); (iii) and  
201 allometrically scaled mass (ASM/ha). Individual density was estimated by dividing the  
202 population size estimate by lake size (ha). Biomass density was calculated according to the  
203 following formula:

204 
$$\text{biomass per ha} = \frac{\sum_{i=1}^{N_{SA}} \text{mass}_{SA} \cdot \hat{N}}{N_{SA} \cdot \text{area (ha.)}}$$

205 Where  $\sum_{i=1}^{N_{SA}} \text{Mass}_{SA}$  is the sum of the masses captured in the index net during size structure  
206 assessment,  $N_{SA}$  is the number of fish captured in the index nets,  $\hat{N}$  is the estimated population  
207 size. This methodology assumes that the size structure assessment was representative of the  
208 population.

209 ASM was calculated by replacing the mass measure with  $\text{mass}^{0.73}$  according to the

210 formula:

$$211 \quad ASM \text{ per ha} = \frac{\sum_{i=1}^{N_{SA}} (mass_{SA}^{0.73})}{N_{SA}} \cdot \hat{N}$$

212 *area (ha.)*

213 This density metric was included to account for the relative decline in mass-specific eDNA  
214 production or excretion rates typically observed as individual organismal mass increases  
215 (Maruyama et al., 2014; Takeuchi et al., 2019; Vanni & McIntyre, 2016). Scaling coefficients  
216 can vary substantially depending on the physiological process, taxonomy or environment  
217 (Allegier et al., 2015; Glazier, 2005). In the absence of data on allometric scaling in eDNA  
218 production, data on allometric scaling in metabolic or excretory rates for the same study species  
219 can represent useful starting points. Data on allometry in excretory rates were unavailable for  
220 brook trout, so the metabolic scaling coefficient obtained from (Hartman & Cox, 2008) was  
221 used: data extracted using the R package *digitizer* (Poisot, 2011) and back-transformed from  
222 figure one in (Hartman & Cox, 2008) indicate an allometric metabolic scaling factor of  
223 approximately 0.73 (0.03 SE).

224 In difficult to sample populations, estimates of relative abundance are often obtained  
225 using CPUE metrics. As a result, most previous studies examining eDNA particle concentration  
226 and abundance utilize similar metrics (Yates et al., 2019). To evaluate the utility of CPUE as a  
227 ‘proxy’ metric of abundance in our study system, CPUE for each lake was quantified as the  
228 mean catch per-unit effort of a large and small index gillnet.

229

230 *eDNA sample collection*

231 eDNA samples were collected between June 30 and July 13<sup>th</sup>, 2018. Sampling was  
232 equidistantly distributed around each lake and included four littoral and four pelagic samples.  
233 Littoral samples were collected approximately 1-3 m from shore at a depth of least 12 inches but  
234 six inches above the bottom to avoid the unintentional collection of sediments. Pelagic samples  
235 were collected from each lake by drawing a line through the center of the lake along its longest  
236 axis; samples were collected along this axis at equidistant intervals at a depth of approximately  
237 0.5m. To avoid between-lake contamination all eDNA samples were collected either from an  
238 inflatable kayak that was decontaminated 48h prior in a 2% bleach solution for 15 minutes  
239 (including paddle and life-jacket) or from a canoe assigned to sample a single specific lake.  
240 Water samples were collected using sterile Whirl-Pak<sup>TM</sup> bags (Uline, Ontario, Canada).

241 Samples were immediately filtered on the lakeshore using two chlorophyll filtering  
242 manifolds bleached in a 30% household bleach solution for ten minutes 2-12h prior to collection.  
243 All samples were stored in the shade prior to filtration in plastic washbasins bleached with a 30%  
244 solution for ten minutes, and all filtering was conducted in the shade under a tarp. Manifolds  
245 were transported in a Polar Bear<sup>TM</sup> backpack cooler (Polar Bear Coolers, Georgia, USA) whose  
246 interior was wiped with a 30% bleach solution for ten minutes. Manifold components were  
247 stored after bleaching and transported individually in sealed plastic zippered bags to limit  
248 contamination. Pencils and markers were also wiped with a 30% bleach solution.

249 One L of sample water from each site was filtered through a 0.7 $\mu$ m-pore glass fibre filter  
250 (GE Healthcare Life Sciences, Ontario, Canada) using a vacuum hand pump (Soil Moisture,  
251 California, USA); each vacuum pump was decontaminated between lakes by wiping with a 30%  
252 bleach solution and resting for ten minutes. All littoral samples were filtered on one manifold

253 and all pelagic samples were filtered on the other. Prior to filtering lake water samples, 1 L of  
254 distilled water was filtered through each manifold as a negative control. Filters were handled  
255 using two metal forceps bleached in a 30% solution for ten minutes and transported in individual  
256 bags; one forceps was used for littoral samples and another forceps was used for pelagic samples.  
257 After filtering, filters were folded and placed directly in a sterile 2 ml microcentrifuge tube filled  
258 with 700µl AL buffer (Qiagen, Maryland, USA) which was then labelled and individually sealed  
259 in a plastic zippered bag and placed in a 2<sup>nd</sup> cooler that was decontaminated by wiping with a  
260 30% bleach solution and resting for ten minutes. This cooler contained two frozen freezer-gel  
261 packs decontaminated in a 30% bleach solution for ten minutes. If a filter became clogged (i.e. <  
262 1 L of water was filtered) the final volume of water filtered was recorded and the sample was  
263 stored in buffer. Filters were immediately transported to and stored in a -20 °C freezer (wiped  
264 with 30% bleach and soaked for ten minutes) at Kootenay Crossing. Filters were stored on dry  
265 ice for transportation to Montreal where they were stored in a -80 °C freezer.

#### 266 *eDNA extraction and analysis*

267 Each filter was extracted using a Qiagen DNeasy Blood and Tissue™ kit and  
268 Qiashredder™ spin column following a modified extraction protocol (see Appendix S1 for  
269 details). Final DNA product was eluted into 130 µl of AE buffer and stored in a clean -20 °C  
270 freezer dedicated to the sole storage of eDNA samples. To avoid cross-contamination between  
271 lakes extractions were conducted on batches from a single lake, with a single extraction blank of  
272 700 µL AL buffer included as an extraction control. Decontamination procedures were identical  
273 for both manifolds, so only a single negative control was extracted per lake. All extractions were  
274 conducted in an extraction room dedicated to the handling of sensitive eDNA samples. This  
275 room receives weekly cleaning with a 10% bleach solution and is free of PCR products or high-

276 concentration DNA. All individuals entering the extraction room were required to wear nitrile  
277 gloves, hair nets, shoe covers, and dedicated, clean lab coats. All lab surfaces were soaked with a  
278 20% bleach solution for ten minutes before and after extractions. PCR Clean Wipes™ (Thermo  
279 Scientific, Massachusetts, USA) were also used to decontaminate all lab surfaces and pipettes  
280 prior to and after extracting or handling eDNA samples.

281         The concentration of brook trout eDNA was quantified using the TaqMan minor groove  
282 assay published in (Wilcox et al., 2013), which targets a region of the brook trout cytochrome *b*  
283 mitochondrial gene. All samples were run in triplicate at a 20 µl final reaction volume on a  
284 Stratagene MX 3000P thermal cycler using Environmental Master Mix 2.0 and 5 µl of template  
285 DNA. Forward and reverse primers were included at a final concentration of 900 nM, with the  
286 probe at a final concentration of 250 nM. Each replicate was spiked with an internal positive  
287 control to test for inhibition; any replicate that exhibited inhibition ( $C_t > 1$  in the internal positive  
288 control) was reanalyzed with diluted template DNA at 60% concentration (3 µl template + 2 µl  
289 of ultrapure water); this was sufficient to relieve inhibition in all cases. Standard curve template  
290 DNA was composed of a synthetic Gblock™ gene fragment (IDT, Iowa, USA) of the targeted  
291 sequence. A triplicate no template control and triplicate five-point standard curve (1250  
292 copies/µl, 250 copies/µl, 50 copies/µl, 5 copies/µl, 2 copies/µl template concentration) were  
293 included on each 96-well plate. All qPCR reaction reagents were aliquoted into single-use  
294 volumes adequate for a single plate and reactions were prepared in the dedicated eDNA room,  
295 with the exception of the standard curve replicates due to the presence of high concentration  
296 synthetic DNA fragments. Reactions were cycled with an initial hold at 95 °C for ten minutes  
297 followed by 45 cycles of 30 seconds at 95 °C and 1 min at 60 °C. eDNA particle concentration at  
298 each site was determined by averaging site-specific replicates. Final mean copy number values

299 were converted (based on total volume of water filtered per sample) to total eDNA particle  
300 concentration per 1 L of sampled water (copies/L).

### 301 *Data Analysis*

302 Mean eDNA particle concentration (copies/L) for each lake was calculated by first  
303 averaging eDNA particle concentrations of the four littoral and four pelagic samples to obtain  
304 mean littoral eDNA concentration and mean pelagic eDNA concentration. The surface area of a  
305 (roughly) circular object increases non-linearly in relation to perimeter and, as a result, the area  
306 of the pelagic zone expressed as a fraction of the total area of a lake tends to increase with lake  
307 size. The relative contribution of the littoral and pelagic zones to the overall mean concentration  
308 of eDNA per lake should therefore be increasingly weighted towards the pelagic eDNA  
309 concentration as lake surface area increases. Our study lakes varied substantially in size (1.7 to  
310 18.5 ha); total pelagic and littoral areas were calculated for each lake using polygons on Google  
311 Earth. In the absence of detailed bathymetry data, the total area of the littoral zone was calculated  
312 by including all lake surface area up to 20m from the shore, with the remaining area assigned to  
313 the pelagic zone. A weighted-mean eDNA concentration for each lake was then calculated by  
314 weighing the littoral and pelagic eDNA concentrations based on the fraction of total lake area  
315 each zone represented.

316 Mean lake eDNA particle concentration (copies/L) was modelled separately as a function  
317 of the three metrics of brook trout density calculated above: individual density (individuals/ha);  
318 biomass density (kg/ha); and allometrically scaled mass (ASM) ( $\sum(\text{individual mass}^{0.73})/\text{ha}$ ).  
319 eDNA particle concentration was included as a dependent variable in a linear regression and a  
320 separate model for each abundance metric was fitted to the observed data. Wald  $F$ -tests were  
321 used to evaluate the significance of fixed-effect terms, with AIC (Akaike, 1974) values used to



322 compare model fit as in (Lacoursière-Roussel, Côté, Leclerc, Bernatchez, & Cadotte, 2016). All  
323 analyses were conducted in R (v.3.3.3) (R Development Core Team, 2017). To assess the  
324 performance of CPUE as a ‘proxy’ metric of abundance, we also examined the relationship  
325 between density and CPUE, as well as eDNA particle concentration and CPUE, using linear  
326 regression.

327

328 *Estimating density and biomass from predicted allometrically scaled mass: a case study for*  
329 *population management*

330 Most researchers/managers would be primarily interested in predicting traditional metrics  
331 of abundance (i.e. density and biomass) from estimated eDNA particle concentrations in similar  
332 ecosystems that lack abundance data. Predicting abundance in unknown systems from known  
333 eDNA particle concentrations would require an inversion of the modelling relationship described  
334 above: abundance would be modelled as a function of eDNA particle concentration. Predicted  
335 estimates of ASM obtained from eDNA samples collected for systems lacking abundance data  
336 cannot be directly converted to traditional metrics of abundance (e.g. individual density or  
337 biomass density) because multiple density/biomass configurations (e.g. many small fish or a  
338 small number of large fish) can produce equivalent ASM values. However, predicted ASM  
339 point-estimates for a system with unknown abundance can be converted to traditional metrics  
340 with additional individual mass distribution data from standardized size structure data. Size  
341 structure data from the unknown system could be scaled allometrically and the resulting scaled  
342 mass values nonparametrically bootstrapped (with replacement) until the cumulative sum of the  
343 bootstrapped values equals the predicted ASM. Individual density could be estimated by totalling  
344 the number of bootstrap “samples” summed to achieve the predicted ASM; biomass density

345 could then be estimated by multiplying the predicted density value by the untransformed mean of  
346 the individual biomass distribution.

347 As a case study, this technique was applied to data collected from Hidden Lake (Banff,  
348 Alberta, Canada). The brook trout population of Hidden Lake was targeted as part of rotenone-  
349 based removal program by Parks Canada. eDNA samples from Hidden lake were collected in  
350 July 2018 and extracted/analyzed using the same methodology as described above. The  
351 estimated “ASM/unit area” of the lake (including 95% prediction intervals) was calculated from  
352 the linear relationship obtained from our nine study lakes. Unfortunately, standardized size  
353 structure data were unavailable; rotenone removal efforts began in August 2018 and no brook  
354 trout remain in the system. However, prior to the use of rotenone mechanical gill netting efforts  
355 were employed during brook trout removal efforts between 2011 and August 2017 (Stitt, *perse.*  
356 *comm.*). By 2016 netting efforts had removed most large fish from the population. Most netted  
357 fish older than age 0+ in Hidden lake were therefore between 90-140mm in length (Sullivan,  
358 Sierra, 2017), although it should be noted that size distribution data obtained from these netting  
359 efforts were not directly comparable to our standardized size structure assessments due to  
360 different netting methodology/gear. The size distribution of fish removed by Parks Canada in  
361 2016 most closely resembles the size distribution of fish in Olive lake, so the Olive size  
362 distribution was utilized as a “proxy” to calculate an approximate pre-rotenone individual density  
363 and biomass density of brook trout inhabiting Hidden lake in 2018. The size distribution of fish  
364 from Olive lake is slightly larger (mean = 149mm) than the 2016 Hidden lake distribution; as a  
365 result, population size estimates derived from this distribution will likely slightly underestimate  
366 the ‘true’ number of individuals present in Hidden Lake. Bootstrap simulations to quantify  
367 individual density and biomass density utilizing the Olive size distribution and predicted ASM of

368 Hidden lake were run for 1000 iterations. Parks Canada estimated the 2018 pre-rotenone  
369 population of Hidden Lake to be between 3300 and 5000 individuals based on the retrieval of  
370 fish corpses post-rotenone, providing some degree of external validation for our predictive model  
371 (Stitt, B, 2018).

372 *Predicting allometric scaling coefficient for eDNA production in brook trout*

373 Allometric scaling coefficients are likely to fall between a value of 0.0 and 1.0; notably,  
374 ( $\sum$  individual mass<sup>0.0</sup>)/ha is equivalent to individual density (fish/ha) and ( $\sum$  individual  
375 mass<sup>1.0</sup>)/ha is equivalent to biomass density (kg/ha). Although we employed an allometric scaling  
376 coefficient of 0.73 in our model (based on metabolic data from brook trout), the “true” allometric  
377 scaling coefficient for eDNA production in our system was unknown. We used our data to  
378 predict the optimal value for the scaling coefficient given the observed eDNA particle  
379 concentration and biomass distribution data observed across our study lakes. To achieve this, we  
380 iteratively generated ASM values from our data using scaling coefficients ranging from 0.00 to  
381 1.00 (increasing by intervals of 0.01) and sequentially modelled eDNA particle concentration  
382 data as a function of each ASM value. AIC values for each model were then used to evaluate  
383 model fit. If eDNA production scales allometrically according to a power function, we predict  
384 that the AIC values across models with scaling coefficients between 0.0 and 1.00 will exhibit an  
385 approximately upward parabolic distribution with a minimum best-fit value that corresponds to  
386 an “optimal” allometric scaling coefficient. According to the general rule described in (Burnham  
387 & Anderson, 2002), models with AIC values within 2 units of the best-fit model AIC (e.g.  $\Delta$ AIC  
388 < 2) also exhibit substantial support; we predict that the ‘true’ allometric scaling coefficient for  
389 brook trout eDNA production in nature will fall between the range of scaling coefficients that

390 produce models within 2 AIC of the ‘best-fit’ scaling coefficient, although future experiments  
391 will be necessary to validate our predictions.

## 392 **Results**

### 393 *Population size estimates and density*

394 Population size estimates ranged from 145 to 3266 individuals, individual density ranged  
395 from 63 to 1131 fish/ha, biomass density ranged from 12.6 to 52.5 kg/ha, and ASM ranged from  
396 3707 to 18600 ASM/ha (Table 2, see Figure 1 for population size structure). Estimates of catch-  
397 per-unit-effort (CPUE) did not exhibit a significant correlation with individual density ( $F_{1,7} =$   
398 0.53,  $p = 0.491$ , Figure S3).

399

### 400 *eDNA concentrations and correlations with density metrics among lakes*

401 Brook trout eDNA was successfully amplified from all samples in all lakes. No  
402 amplification was observed in any negative controls or extraction blanks. The  $R^2$  values for  
403 standard curves ranged from 0.984 to 0.995, with an estimated efficiency ranging from 84.2 to  
404 95.1%. Littoral and pelagic eDNA concentrations varied substantially by lake (Table 3). After  
405 weighing for lake zone area, mean eDNA concentrations ranged from 592 copies/L in Cobb to  
406 7805 copies/L in Olive.

407 Linear models for each density metric demonstrated positive and significant correlations  
408 with eDNA particle concentration (Table 4, Figure 2). Individual density, biomass density, and  
409 ASM accounted for 59%, 63%, and 78% of the variation in observed eDNA particle  
410 concentration (adjusted  $R^2$ ), respectively. AIC values indicated that individual density and  
411 biomass density metrics provided roughly equivalent model fit; however, the ASM metric  
412 provided substantially improved model fit relative to individual density and biomass density  
413 ( $\Delta$ AIC of 5.7 and 4.6, respectively). CPUE did not exhibit a significant correlation with eDNA  
414 particle concentration (Table 4, Figure S4).

415 *Estimating density and biomass from predicted allometrically scaled mass: a case study for*  
416 *population management*

417         The eDNA concentration of Hidden lake littoral and pelagic eDNA samples averaged  
418 2653 and 342 copies/L, respectively, with a weighted mean average eDNA particle concentration  
419 of 847 copies/L (Table 3). Based on a linear model using data from the nine study lakes, Hidden  
420 lake had an estimated ASM/ha of 4279.6 (Figure 3). The predicted ASM estimate for Hidden  
421 Lake was converted to traditional metrics of abundance (individual density and biomass density)  
422 by bootstrap sampling allometrically scaled mass values (with replacement) from the Olive lake  
423 size structure distribution (which was closest to the likely size structure of the Hidden lake  
424 population) until the cumulative sum of all bootstrap sampled values equalled the predicted  
425 ASM/ha from the linear model. After 1000 iterations, the mean number of individual mass  
426 values sampled from the Olive size distribution was 278.4, which represents the individual  
427 density (ind/ha) point-estimate for Hidden Lake; this corresponds to a total population size  
428 estimate of 3286 individuals. This point estimate was similar to the 2018 pre-rotenone population  
429 size estimate from Parks Canada of 3300-5000 individuals (Stitt, B, 2018), given the use of the  
430 slightly larger Olive size distribution during the bootstrap procedure. Predicted total biomass was  
431 143.0 kg, with a biomass density of 12.1 kg/ha. Notably, point estimates of biomass density rank  
432 Hidden lower than all nine study lakes, likely as a result of previous fish removal efforts between  
433 2011 and 2017 in Hidden Lake. Upper 95% prediction intervals for population size, total  
434 biomass, density, and biomass were 7629 individuals, 332.0 kg, 646.5 fish/ha, and 28.1 kg/ha,  
435 respectively. Due to the overall low concentration of eDNA present in the lake lower 95%  
436 prediction intervals overlapped with zero for all four parameters.

437

438 *Predicting the allometric scaling coefficient for eDNA production in brook trout*

439           Based on model AIC values, a scaling coefficient of 0.72 best explained patterns of  
440 eDNA particle concentration across the nine study lakes; models with scaling coefficients  
441 between 0.47 and 0.89 generated  $\Delta$ AIC values  $< 2$  (Figure 4).

## 442 **Discussion**

443           Our study provides strong support for the hypothesis that eDNA production scales non-  
444 linearly with mass according to a power function. Incorporating allometric scaling coefficients to  
445 account for the distribution of biomass across individuals substantially improved predictive  
446 models, indicating that the distribution of biomass across individuals within a population may  
447 have an important effect when scaling individual eDNA production rates to the population-level.  
448 Incorporating metabolic scaling coefficients for mass into models of eDNA particle  
449 concentration and organismal abundance may therefore be particularly important in species that  
450 exhibit substantial inter-population variation in size distributions. Our findings contribute to a  
451 broader understanding of the ecology of eDNA production and have important implications for  
452 many eDNA applications. While the focus of this study was on the relationship between eDNA  
453 particle concentration and abundance using qPCR techniques, allometry in species with variable  
454 size structure could, for example, partially account for the variation observed in species-specific  
455 read number across environments in metabarcoding studies.

456           This study also reaffirms previous findings that metrics of population abundance  
457 correlate with species-specific eDNA particle concentration in natural environments (Klobucar,  
458 Rodgers, & Budy, 2017; Nevers et al., 2018; Pilliod et al., 2013; Schmelzle & Kinziger, 2016;  
459 Thomsen et al., 2012). Previous research has demonstrated a moderate correlation between  
460 density and/or biomass and eDNA particle concentration in lotic systems for brook trout  
461 (Baldigo, Sporn, George, & Ball, 2017; Wilcox et al., 2016). We found similar relationships  
462 within lentic systems, but also demonstrate that they can be considerably improved by  
463 integrating allometric scaling coefficients into estimates of organismal abundance.



464           Notably, the correlation coefficients we observed between eDNA concentration and all  
465 three metrics of abundance were greater than most previous studies conducted in nature (Yates et  
466 al., 2019). The relatively strong correlations we observed between our abundance metrics and  
467 eDNA concentration could also be due to the methodology with which we assessed population  
468 size. Our estimates of population size were obtained using mark-recapture studies and unbiased  
469 measures of size-structuring, which provided precise and standardized estimates of individual  
470 density, biomass density, and ASM. However, such estimates are rare in published  
471 eDNA/abundance studies; conducting mark-recapture studies to estimate population size are time  
472 consuming and require a substantial commitment of labour and resources. To date only a handful  
473 of eDNA studies in nature have specifically enumerated population size (Klobucar et al., 2017;  
474 Levi et al., 2019; Tillotson et al., 2018) rather than proxies for abundance, such as CPUE (Yates  
475 et al., 2019). CPUE may be appropriate if it exhibits a strong correlation with abundance, but in  
476 some systems CPUE can perform poorly as a proxy for abundance (Hubert et al., 2012; Rose &  
477 Kulka, 1999). In our study systems CPUE did not exhibit a significant correlation with individual  
478 density and, as a result, eDNA concentration. Some of the substantial unexplained variation in  
479 nature between eDNA concentration and abundance observed in other systems could result from  
480 reliance on CPUE as a ‘proxy’ for abundance, although we acknowledge that for many species it  
481 may often be impractical or impossible to directly estimate population size.

482           It is important to note, however, that our abundance estimates may miss a small fraction  
483 of the adult population and do not account for juvenile (age 0+) abundance because fish were not  
484 included in the mark-recapture study until they were at least 80mm (to avoid excessive tagging  
485 mortality). Population size estimates therefore represent underestimates of true population census  
486 size. Discrepancies in juvenile abundance/density across lakes could account for some of the

487 remaining unexplained variation present in our model, particularly since smaller fish would be  
488 expected to exhibit higher mass-specific eDNA production rates. Similarly, temperature is  
489 known to have a strong effect on metabolic rates (Brown et al., 2004) and eDNA production (Jo  
490 et al., 2019). Notably, Temple lake exhibited a substantially lower concentration of eDNA than  
491 expected from its ASM estimate; at 3.5 °C, Temple lake was also substantially colder than the  
492 other eight study lakes during eDNA sampling (8.9-17.2 °C). Although we lacked the replication  
493 to do so, integrating other important environmental variables (e.g. temperature, pH, etc.) into  
494 models of eDNA particle concentration across environments could further improve predictive  
495 models.

496         Despite these caveats, we demonstrate that it is possible to predict estimates of abundance  
497 with eDNA samples and population size structure data in similar ecosystems that lack abundance  
498 data. The population size point estimate for Hidden Lake from our ASM/eDNA model (and  
499 based on the Olive “proxy” size distribution) was similar to the pre-rotenone population size  
500 based on Parks Canada estimates. Although predicted density metrics for Hidden lake exhibited  
501 wide upper 95% prediction intervals, they still provided enough information to facilitate relative  
502 comparisons to the nine study lakes; we can predict with some certainty, for example, that  
503 Hidden Lake had a lower biomass density relative to two of the nine study lakes (Dog and  
504 Olive). Furthermore, 95% prediction intervals represent a relatively stringent criteria of certainty;  
505 75% or 80% prediction intervals might still represent “good enough” information to help guide  
506 managerial or research decisions.

507         Most significantly, our results highlight the need for further empirical studies exploring  
508 and validating allometric scaling via power functions as a framework for modelling eDNA  
509 particle production rates. While we demonstrate that incorporating allometric scaling coefficients

510 substantially improves models predicting abundance and eDNA concentration at the population  
511 level, we have not directly quantified how eDNA production scales allometrically in brook trout  
512 at the level of individual organisms. Nevertheless, recent experiments demonstrate that mass-  
513 specific eDNA production rates tend to decline as individual mass increases (Maruyama et al.,  
514 2014; Mizumoto et al., 2017; Takeuchi et al., 2019). We found that a scaling coefficient of 0.72  
515 best described patterns of eDNA concentration for our study species across our nine study lakes;  
516 this value closely aligned with the metabolic scaling coefficient for brook trout from (Hartman &  
517 Cox, 2008). Scaling coefficients between 0.51 and 0.87 produced models with  $\Delta AIC$  values  $< 2$ ;  
518 we therefore predict that the ‘true’ allometric scaling coefficient for eDNA production in brook  
519 trout will likely fall within this interval. To validate our findings and test our subsequent  
520 predictions, further experiments to quantify allometric scaling of eDNA production at the  
521 individual level in brook trout are necessary.

522         As a well-supported general theory in ecology, experimental designs developed to test  
523 MTE hypotheses (e.g. (Allegier et al., 2015; Hartman & Cox, 2008)) can inform future  
524 experiments examining the effect of allometry on eDNA production rates. Notably, previous  
525 experiments investigating allometric scaling in excretion or metabolic rates quantified rates at the  
526 level of *individual* organisms (Allegier et al., 2015; Hartman & Cox, 2008; Vanni & McIntyre,  
527 2016). Previous laboratory experiments quantifying the effect of biomass on eDNA  
528 production/shedding rates typically pooled organisms to create different biomass treatments  
529 (Doi, Uchii, Takahara, & Matsuhashi, 2015; Klymus et al., 2015; Lacoursière-Roussel, Rosabal,  
530 & Bernatchez, 2016; Mizumoto et al., 2017; Takahara et al., 2012). At best, such experiments  
531 pool organisms from similar size-classes, in which case eDNA production/abundance  
532 relationships across ‘treatments’ only reflect changes in abundance within a specific age- or size-

533 class. Such experimental designs are likely to produce a strong relationship between eDNA  
534 concentration and biomass, as has been found in a meta-analytic review (Yates et al., 2019).  
535 While such studies were necessary to empirically quantify a preliminary correlation between  
536 eDNA particle concentration and metrics of abundance, they might obscure critical differences in  
537 mass-specific eDNA production rates across size classes that could have important consequences  
538 for population-level rates. Natural populations often exhibit substantial variation in the  
539 distribution of body size across individuals; the failure to account for allometric scaling in the  
540 relationship between biomass and eDNA production might partially explain the failure to  
541 translate the strong relationships observed in laboratory experiments to nature (Sebens, 1987).  
542 Notably, our eDNA/abundance models utilizing ASM exhibited correlation coefficients  
543 comparable to those typically observed in laboratory environments (Yates et al., 2019).

544         It may be possible to investigate allometry in eDNA production by pooling individuals  
545 that are the same size within replicates. However, we would advise against this because  
546 behavioural interactions between fish at high density in confined spaces may impact eDNA  
547 production; some studies have demonstrated that eDNA production per fish increases at high  
548 densities (Id et al., 2019). Brook trout, for example, are known to exhibit aggressive behaviour  
549 towards conspecifics (McNicol, Scherer, & Murkin, 1985), which could increase eDNA particle  
550 concentration at high densities due to increased activity and/or injuries inflicted upon each other.  
551 If size classes exhibit different behaviour at high densities, this could further affect estimates of  
552 allometric scaling. Future studies examining allometric scaling in eDNA production should  
553 therefore incorporate individuals from a gradient of age/size classes and quantify organismal  
554 eDNA production at the *individual*-level, as in (Takeuchi et al., 2019). Notably, the two studies  
555 to examine eDNA production rates at an individual level across age/size classes found that

556 larger, older individuals exhibited lower mass-specific eDNA production rates (Maruyama et al.,  
557 2014; Takeuchi et al., 2019). There is also a critical need to conduct such experiments *in situ* at  
558 field study sites on wild organisms, as in (Pilliod, Goldberg, Arkle, & Waits, 2014). Laboratory  
559 experiments, while important from a validation perspective, may not reflect natural excretion  
560 processes because study organisms are housed in artificial conditions, fed artificial diets, and are  
561 often subject to fasting regimes (Vanni & McIntyre, 2016). Furthermore, size-scaling  
562 coefficients for metabolic processes such as nutrient excretion exhibit substantial interspecific  
563 variation and can even include values greater than 1 (Allegier et al., 2015; Vanni & McIntyre,  
564 2016). Allometric scaling in eDNA production may therefore exhibit similar variability across  
565 species and should be investigated on a case-by-case basis.

566

## 567 *Conclusions*

568 Our results provide evidence supporting the hypothesis that eDNA production scales  
569 allometrically with organism mass and can be modelled according to the power function:

$$570 \quad I = I_0 * M^b$$

571 We have demonstrated that the incorporation of additional (but straightforward to collect) size  
572 structure data to integrate key allometric scaling predications resulted in substantial improvement  
573 in models of eDNA concentration across environments. Future studies on eDNA/abundance  
574 relationships in nature should consider incorporating allometry, particularly when study species  
575 exhibit substantial inter-population variation in size distributions. However, there is also a need  
576 to validate this hypothesis in controlled experimental contexts at the level of individual  
577 organisms. As a well-developed ecological theory validated by numerous empirical studies  
578 (Vanni & McIntyre, 2016), the literature on the MTE represents a robust methodological

579 foundation that future studies can utilize to explore relationships between a variety of  
580 environmental and ecological factors that might influence organismal production of eDNA. Such  
581 studies could further improve predictive models estimating abundance from eDNA particle  
582 concentration to the extent that, in some circumstances, species-specific eDNA particle  
583 concentration might be a reliable ecological indicator of abundance.

584         Predictive models would need to be calibrated on a system- and species-specific basis.  
585 The extent to which models for a particular species can be extended to different ecosystems or  
586 geographical regions also remains unknown. Future studies employing the methodology  
587 developed herein will likely need to construct models from population size/abundance estimates  
588 combined with standardized size distribution data on an individual species/system basis. These  
589 studies will also need to collect size distribution data, in addition to eDNA samples, to predict  
590 the density or biomass of organisms in similar ecosystems that lack abundance data. Direct  
591 estimates of allometric scaling coefficients for study species would also likely improve  
592 predictive models, although metabolic or excretory allometric scaling coefficients estimated in  
593 other empirical studies on the same (or closely related) species may represent useful starting  
594 points. In the absence of any other empirical data, the general scaling coefficient predicted by the  
595 MTE (0.75) may also suffice.

596         Depending on the species studied, obtaining robust population size estimates and  
597 individual size distribution data to calibrate initial models can often be difficult, labour intensive,  
598 and come with a substantial monetary cost. However, the benefits might be substantial – the idea  
599 that future researchers or managers might be able to obtain reasonable estimates of abundance  
600 from eight water samples and a small number of gill net sets is, from an ecologist's perspective,  
601 exhilarating.

602 **Acknowledgements:**

603 We would like to thank Brent Brookes, Jacob Farkas, Tom Ridgeon, Natalie Dupont, Thaïs  
604 Bernos, Laura Bogaard, Haley Tunna, Ben Kelley, Mélia Lagacé, and Mathilde Tissier for their  
605 assistance conducting the mark-recapture experiments and collecting eDNA samples and Joanne  
606 Littlefair for her help in the laboratory. We would also like to thank Taylor Wilcox for his advice  
607 on working with the qPCR primer/probe set. This research was funded by a Fonds de recherche  
608 du Québec - Nature et technologies (FRQNT) team grant (AMD, MEC, DJF) and a Natural  
609 Sciences and Engineering Research Council of Canada (NSERC) strategic project grant (DJF,  
610 JP, AMD). DMG was funded by the NSERC Strategic Project Grant awarded to DJF and co-  
611 applicants. MCY was funded by an NSERC EcoLac post-doctoral scholarship and FRQNT post-  
612 doctoral scholarship.

613 **References**

- 614
- 615 Akaike, H. (1974). A new look at the statistical model identification. *IEEE Transactions on*  
616 *Automatic Control*, *19*, 716–723.
- 617 Allegier, J. E., Wenger, S. J., Rosemond, A. D., Schindler, D. E., & Layman, C. A. (2015).  
618 Metabolic theory and taxonomic identity predict nutrient recycling in a diverse food web.  
619 *PNAS*, *112* (20). doi:10.1073/pnas.1420819112
- 620 Allen, A. P., & Gillooly, J. F. (2009). Towards an integration of ecological stoichiometry and the  
621 metabolic theory of ecology to better understand nutrient cycling. *Ecology Letters*, *12*, 369–  
622 384. doi:10.1111/j.1461-0248.2009.01302.x
- 623 Baldigo, B. P., Sporn, L. A., George, S. D., & Ball, J. A. (2017). Efficacy of environmental DNA  
624 to detect and quantify brook trout populations in headwater streams of the Adirondack  
625 Mountains, New York. *Transactions of the American Fisheries Society*, *146*(1), 99–111.
- 626 Bonar, S. A., Hubert, W. A., & Willis, D. W. (2009). *Standard methods for sampling North*  
627 *American freshwater fishes*. Bethesda, Maryland: American Fisheries Society.
- 628 Brown, J. H., Gillooly, J. F., Allen, A. P., Savage, V. ., & West, G. B. (2004). Toward a  
629 metabolic theory of ecology. *Ecology*, *85*(7), 1771–1789.
- 630 Burnham, K. P., & Anderson, D. R. (2002). *Model Selection and Inference: A Practical*  
631 *Information-Theoretic Approach* (2nd ed.). New York: Springer-Verlag.
- 632 Doi, H., Uchii, K., Takahara, T., & Matsushashi, S. (2015). Use of Droplet Digital PCR for  
633 Estimation of Fish Abundance and Biomass in Environmental DNA Surveys. *PLoS ONE*,  
634 1–11. doi:10.1371/journal.pone.0122763
- 635 Donald, D. B., Anderson, R. S., Mayhood, D. W., Anderson, R. S., & Correlations, D. W. M.  
636 (1980). Correlations Between Brook Trout Growth and Environmental Variables for  
637 Mountain Lakes in Alberta. *Transactions of the American Fisheries Society*, *109*(October),  
638 603–610. doi:10.1577/1548-8659(1980)109<603
- 639 Eichmiller, J. J., Miller, L. M., & Sorensen, P. W. (2016). Optimizing techniques to capture and  
640 extract environmental DNA for detection and quantification of fish. *Molecular Ecology*  
641 *Resources*, *16*, 56–68. doi:10.1111/1755-0998.12421
- 642 Glazier, D. S. (2005). Beyond the ‘3/4-power law’: variation in the intra- and interspecific  
643 scaling of metabolic rate in animals. *Biological Reviews*, *80*, 611–662.  
644 doi:10.1017/S1464793105006834
- 645 Goldberg, C. S., Strickler, K. M., & Pilliod, D. S. (2015). Moving environmental DNA methods  
646 from concept to practice for monitoring aquatic macroorganisms. *Biological Conservation*,  
647 *183*, 1–3. doi:10.1016/j.biocon.2014.11.040
- 648 Guernon, S., Yates, M. C., Fraser, D. J., & Derry, A. M. (2018). The co-evolution of adult body  
649 mass and excretion rate between genetically size-divergent brook trout populations. *CJFAS*,  
650 *Online*. doi:http://dx.doi.org/10.1007/s00787-010-0141-5
- 651 Hartman, K. J., & Cox, M. (2008). Refinement and Testing of a Brook Trout Bioenergetics



- 652 Model. *Transactions of the American Fisheries Society*, 137(June 2014), 357–363.  
653 doi:10.1577/T05-243.1
- 654 Hubert, W. ., Pope, K. L., & Dettmers, J. M. (2012). Passive Capture Techniques. In A. V. Zale,  
655 D. L. Parrish, & T. . Sutton (Eds.), *Fisheries Techniques* (3rd ed.). Bethesda, Maryland:  
656 American Fisheries Society.
- 657 Id, Y. M., Wong, M. K., Kanbe, T., Araki, H., Kashiwabara, T., Ijichi, M., ... Hyodo, S. (2019).  
658 Spatiotemporal distribution of juvenile chum salmon in Otsuchi Bay, Iwate, Japan, inferred  
659 from environmental DNA. *PLoS ONE*, 1–22. Retrieved from  
660 <https://doi.org/10.1371/journal.pone.0222052> September
- 661 Immell, D., & Anthony, R. G. (2008). Estimation of Black Bear Abundance Using a Discrete  
662 DNA Sampling Device. *The Journal of Wildlife Management*, 72(1), 324–330.  
663 doi:10.2193/2006-297
- 664 Isaac, N. J. ., & Carbone, C. (2010). Why are metabolic scaling exponents so controversial?  
665 Quantifying variance and testing hypotheses. *Ecology Letters*, 13, 728–735.  
666 doi:10.1111/j.1461-0248.2010.01461.x
- 667 Jamieson, I. G., & Allendorf, F. W. (2012). How does the 50/500 rule apply to MVPs? *Trends in*  
668 *Ecology and Evolution*, 27(10), 580–584. doi:10.1016/j.tree.2012.07.001
- 669 Jo, T., Murakami, H., Yamamoto, S., Masuda, R., & Minamoto, T. (2019). Effect of water  
670 temperature and fish biomass on environmental DNA shedding, degradation, and size  
671 distribution. *Ecology and Evolution*, (September 2018), 1–12. doi:10.1002/ece3.4802
- 672 Johnson, L. (1983). Homeostatic Characteristics of Single Species Fish Stocks in Arctic Lakes.  
673 *Canadian Journal of Fisheries and Aquatic Sciences*, 40(96393), 987–1024.
- 674 Klobucar, S. L., Rodgers, T. W., & Budy, P. (2017). At the forefront: evidence of the  
675 applicability of using environmental DNA to quantify the abundance of fish populations in  
676 natural lentic waters with additional sampling considerations. *Canadian Journal of*  
677 *Fisheries and Aquatic Sciences*, 74, 2030–2034.
- 678 Klymus, K. E., Richter, C. A., Chapman, D. C., & Paukert, C. (2015). Quantification of eDNA  
679 shedding rates from invasive bighead carp *Hypophthalmichthys nobilis* and silver carp  
680 *Hypophthalmichthys molitrix*. *Biological Conservation*, 183, 77–84.  
681 doi:10.1016/j.biocon.2014.11.020
- 682 Krebs, C. J. (2009). *Ecology: The experimental analysis of distribution and abundance*. (6th ed.).  
683 San Francisco, CA: Pearson Benjamin Cummings.
- 684 Lacoursière-Roussel, A., Côté, G., Leclerc, V., Bernatchez, L., & Cadotte, M. (2016).  
685 Quantifying relative fish abundance with eDNA: a promising tool for fisheries management.  
686 *Journal of Applied Ecology*, 53(4), 1148–1157. doi:10.1111/1365-2664.12598
- 687 Lacoursière-Roussel, A., Rosabal, M., & Bernatchez, L. (2016). Estimating fish abundance and  
688 biomass from eDNA concentrations: variability among capture methods and environmental  
689 conditions. *Molecular Ecology Resources*, 16, 1401–1414. doi:10.1111/1755-0998.12522
- 690 Levi, T., Allen, J. M., Bell, D., Joyce, J., Russell, J. R., David, A., ... Yu, D. W. (2019).

- 691 Environmental DNA for the enumeration and management of Pacific salmon. *Molecular*  
692 *Ecology Resources*, 19, 597–608.
- 693 Luikart, G., Ryman, N., Tallmon, D. A., Schwartz, M. K., & Allendorf, F. W. (2010). Estimation  
694 of census and effective population sizes: The increasing usefulness of DNA-based  
695 approaches. *Conservation Genetics*, 11(2), 355–373. doi:10.1007/s10592-010-0050-7
- 696 Maruyama, A., Nakamura, K., Yamanaka, H., Kondoh, M., & Minamoto, T. (2014). The release  
697 rate of environmental DNA from juvenile and adult fish. *PLoS ONE*, 9(12), 1–13.  
698 doi:10.1371/journal.pone.0114639
- 699 McNicol, R. E., Scherer, E., & Murkin, E. J. (1985). Quantitative field investigations of feeding  
700 and territorial behaviour of young- of-the-year brook charr, *Salvelinus fontinalis*.  
701 *Environmental Biology of Fishes*, 12(3), 219–229.
- 702 Millien, V., Lyons, K., Olson, L., Smith, F. A., Wilson, A. B., & Yom-Tov, Y. (2006). Ecotypic  
703 variation in the context of global climate change: revisiting the rules. *Ecology Letters*, 9,  
704 853–869. doi:10.1111/j.1461-0248.2006.00928.x
- 705 Mizumoto, H., Urabe, H., Kanbe, T., Fukushima, M., & Araki, H. (2017). Establishing an  
706 environmental DNA method to detect and estimate the biomass of Sakhalin taimen, a  
707 critically endangered Asian salmonid. *Limnology*, 19, 219–227. doi:10.1007/s10201-017-  
708 0535-x
- 709 Morgan, G. E. (2002). *Manual of instructions - fall walleye index netting (FWIN)*. Retrieved  
710 from <https://www.ontario.ca/page/fall-walleye-index-netting-instructions#section-8>
- 711 Nevers, M. B., Byappanahalli, M. N., Morris, C. C., Shively, D., Przybyla-kelly, K., Spoljaric,  
712 A. M., ... Roseman, E. F. (2018). Environmental DNA (eDNA): A tool for quantifying the  
713 abundant but elusive round goby (*Neogobius melanostomus*). *PloS One*, 1–22.  
714 doi:10.5066/F7GH9H6F.Funding
- 715 Ogle, D. H. (2016). *Introductory Fisheries Analyses with R* (1st ed.). Boca Raton: CRC Press.
- 716 Ovenden, J. R., Blower, D. C., Dudgeon, C. L., Jones, A. T., Buckworth, R. C., Leigh, G. M., ...  
717 Bennett, M. B. (2016). Can genetic estimates of population size contribute to fisheries stock  
718 assessments? *Journal of Fish Biology*, 1–14. doi:10.1111/jfb.13129
- 719 Pilliod, D. S., Goldberg, C. S., Arkle, R. S., & Waits, L. P. (2013). Estimating occupancy and  
720 abundance of stream amphibians using environmental DNA from filtered water samples.  
721 *Canadian Journal of Fisheries and Aquatic Sciences*, 1130(January), 1123–1130.
- 722 Pilliod, D. S., Goldberg, C. S., Arkle, R. S., & Waits, L. P. (2014). Factors Influencing Detection  
723 of eDNA from a Stream-dwelling Amphibian Authors. *Molecular Ecology Resources*, 1,  
724 109–116. doi:10.1111/1755-0998.12159
- 725 Poisot, T. (2011). The digitize package: extracting numerical data from scatterplots. *The R*  
726 *Journal*, 3(1), 25–26.
- 727 Post, J. R., Parkinson, E. A., & Johnston, N. T. (1999). Density-dependent processes in structures  
728 fish populations: interaction strengths in whole-lake experiments. *Ecological Monographs*,  
729 69(2), 155–175.

- 730 R Development Core Team. (2017). R: a language and environment for statistical computing. *R*  
731 *Foundation for Statistical Computing Vienna Austria, 0*, {ISBN} 3-900051-07-0.  
732 doi:10.1038/sj.hdy.6800737
- 733 Rose, G. A., & Kulka, D. W. (1999). Hyperaggregation of fish and fisheries: how catch-per-unit-  
734 effort increased as the northern cod (*Gadus morhua*) declined. *Canadian Journal of*  
735 *Fisheries and Aquatic Sciences*, *56*, 118–127.
- 736 Schaus, M. H., Godwin, W., Battoe, L., Coveney, M., Lowe, E., Roth, R., ... Zimmerman, A.  
737 (2010). Impact of the removal of gizzard shad (*Dorosoma cepedianum*) on nutrient cycles in  
738 Lake Apopka, Florida. *Freshwater Biology*, *55*, 2401–2413. doi:10.1111/j.1365-  
739 2427.2010.02440.x
- 740 Schindler, D. E., & Eby, L. A. (1997). Stoichiometry of fishes and their prey: implications for  
741 nutrient recycling. *Ecology*, *78*(6), 1816–1831.
- 742 Schmelzle, M. C., & Kinziger, A. P. (2016). Using occupancy modelling to compare  
743 environmental DNA to traditional field methods for regional-scale monitoring of an  
744 endangered aquatic species. *Molecular Ecology Resources*, *16*, 895–908. doi:10.1111/1755-  
745 0998.12501
- 746 Schnabel, Z. E. (1938). The Estimation of the Total Fish Population of a Lake. *The American*  
747 *Mathematical Monthly*, *46*, 348–352. doi:10.1080/00029890.1938.11990818
- 748 Schwarz, C. J., & Seber, G. A. F. (1999). A review of estimating animal abundance III.  
749 *Statistical Science*, *14*, 1–126.
- 750 Sebens, K. P. (1987). The ecology of indeterminate growth in animals. *Annual Review of*  
751 *Ecology and Systematics*, *18*, 371–407.
- 752 Seber, G. A. F. (1986). A Review of Estimating Animal Abundance. *Biometrics*, *42*(2), 267–292.
- 753 Seber, G. A. F. (2002). *The Estimation of Animal Abundance and Related Parameters* (2nd ed.).  
754 New Jersey: Blackburn Publishing.
- 755 Shea, B. O., Fryer, R. J., Pert, C. C., & Bricknell, I. R. (2006). Determination of the surface area  
756 of a fish. *Journal of Fish Diseases*, *29*, 437–440.
- 757 Stewart, K. A. (2019). Understanding the effects of biotic and abiotic factors on sources of  
758 aquatic environmental DNA Understanding the effects of biotic and abiotic factors.  
759 *Biodiversity and Conservation*, (February). doi:10.1007/s10531-019-01709-8
- 760 Stitt, B, P. C. (2018). *2018 summary report for the chemical removal of brook trout from Hidden*  
761 *Lake, Upper Corral Creek and Tributaries - Draft report.*
- 762 Sullivan, Sierra, P. C. (2017). *Saving wild trout: Upper Corral Creek and Hidden Lake brook*  
763 *trout removal and Westslope Cutthroat trout reintroduction - Banff National Park, Draft*  
764 *Report.*
- 765 Takahara, T., Minamoto, T., Yamanaka, H., Doi, H., & Kawabata, Z. (2012). Estimation of Fish  
766 Biomass Using Environmental DNA. *PLoS ONE*, *7*(4), 3–10.  
767 doi:10.1371/journal.pone.0035868

- 768 Takeuchi, A., Iijima, T., Kakuzen, W., Watanab, S., & Yamada, Y. (2019). Release of eDNA by  
769 different life history stages and during spawning activities of laboratory-reared Japanese  
770 eels for interpretation of oceanic survey data. *Scientific Reports*, 9(April), 1–9.  
771 doi:10.1038/s41598-019-42641-9
- 772 Thomsen, P. F., Kielgast, J. O. S., Iversen, L. L., Wiuf, C., Rasmussen, M., Thomas, M., ...  
773 Willerslev, E. (2012). Monitoring endangered freshwater biodiversity using environmental  
774 DNA. *Molecular Ecology*, 21, 2565–2573. doi:10.1111/j.1365-294X.2011.05418.x
- 775 Tillotson, M. D., Kelly, R. P., Duda, J., Hoy, M., Kralj, J., & Quinn, T. P. (2018). Concentrations  
776 of environmental DNA (eDNA) reflect spawning salmon abundance at fine spatial and  
777 temporal scales. *Biological Conservation*, 220(February), 1–11.  
778 doi:10.1016/j.biocon.2018.01.030
- 779 Vanni, M. J., & McIntyre, P. B. (2016). Predicting nutrient excretion of aquatic animals with  
780 metabolic ecology and ecological stoichiometry: A global synthesis. *Ecology*, 97(12),  
781 3460–3471. doi:10.1002/ecy.1582
- 782 Ward, H. G. M., Askey, P. J., Post, J. R., Varkey, D. A., & Mcallister, M. K. (2012). Basin  
783 characteristics and temperature improve abundance estimates from standard index netting of  
784 rainbow trout (*Oncorhynchus mykiss*) in small lakes. *Fisheries Research*, 131–133, 52–59.  
785 doi:10.1016/j.fishres.2012.07.011
- 786 Wilcox, T. M., Mckelvey, K. S., Young, M. K., Jane, S. F., Lowe, W. H., Whiteley, A. R., &  
787 Schwartz, M. K. (2013). Robust Detection of Rare Species Using Environmental DNA: The  
788 Importance of Primer Specificity. *PLoS ONE*, 8(3). doi:10.1371/journal.pone.0059520
- 789 Wilcox, T. M., Mckelvey, K. S., Young, M. K., Sepulveda, A. J., Shepard, B. B., Jane, S. F., ...  
790 Schwartz, M. K. (2016). Understanding environmental DNA detection probabilities : A case  
791 study using a stream-dwelling char *Salvelinus fontinalis*. *Biological Conservation*, 194,  
792 209–216. doi:10.1016/j.biocon.2015.12.023
- 793 Yates, M. C., Bernos, T. A., & Fraser, D. J. (2017). A critical assessment of estimating census  
794 population size from genetic population size (or vice versa) in three fishes. *Evolutionary*  
795 *Applications*, 10(9). doi:10.1111/eva.12496
- 796 Yates, M. C., Fraser, D. J., & Derry, A. M. (2019). Meta-analysis supports further refinement of  
797 eDNA for monitoring aquatic species-specific abundance in nature. *Environmental DNA*,  
798 1(January), 5–13. doi:10.1002/edn3.7
- 799

800 **Data Accessibility Statement:**

801 eDNA particle concentration data for each lake will be deposited in the Dryad Digital Repository  
802 upon acceptance.

803 **Author contributions**

804 MCY collected eDNA samples and analyzed eDNA data. DG collected and analyzed mark-  
805 recapture and size structure data. Statistical analyses were conducted by MCY. MCY wrote the  
806 first draft of the manuscript, and all authors contributed substantially to subsequent drafts.

807 **Tables**

808 Table 1: Size structure gill net effort and fyking (mark-recapture) effort. SS refers to size  
809 structure assessment, percent SS refers to the proportion of population harvested during size  
810 structure assessment.

811

| Site     | SS<br>Samples | Percent<br>SS | SS<br>CPUE | Mark/Recapture<br>days | Total Marks<br>Applied |
|----------|---------------|---------------|------------|------------------------|------------------------|
| Cobb     | 104           | 0.72          | 7          | 20                     | 24                     |
| Mud      | 84            | 0.10          | 42         | 20                     | 364                    |
| Olive    | 160           | 0.09          | 53         | 21                     | 307                    |
| Ross     | 128           | 0.09          | 64         | 19                     | 571                    |
| Temple   | 165           | 0.10          | 41         | 25                     | 409                    |
| Dog      | 187           | 0.06          | 94         | 30                     | 617                    |
| Helen    | 41            | 0.07          | 41         | 12                     | 172                    |
| Margaret | 171           | 0.08          | 43         | 23                     | 414                    |
| McNair   | 27            | 0.13          | 27         | 14                     | 118                    |

812

813

814 Table 2: Density metric estimates for each population. N = population size, ASM =  
815 allometrically scaled mass. 95% confidence intervals for 'N' are given in brackets.  
816

| Site     | N                 | Ha   | Mean Ind. Mass (g) | Fish/ha | Kg/ha | ASM/ha | eDNA (copies/L) |
|----------|-------------------|------|--------------------|---------|-------|--------|-----------------|
| Cobb     | 145 (94, 237)     | 2.3  | 404.8              | 63      | 25.7  | 5663   | 592.2           |
| Dog      | 3266 (2715, 4097) | 11.5 | 184.8              | 284     | 52.5  | 13962  | 5131.1          |
| Helen    | 557 (420, 755)    | 2.5  | 83.9               | 225     | 18.8  | 6187   | 2445.9          |
| Margaret | 2017 (1638, 2623) | 18.0 | 112.3              | 112     | 12.6  | 3707   | 1240.4          |
| McNair   | 201 (158, 276)    | 1.7  | 137.3              | 121     | 16.6  | 4736   | 3050.5          |
| Mud      | 860 (733, 1040)   | 7.2  | 141.9              | 119     | 17.0  | 4587   | 1138.7          |
| Olive    | 1877 (1459, 2628) | 1.7  | 43.1               | 1131    | 48.8  | 18601  | 7805.1          |
| Ross     | 1392 (1211, 1635) | 6.6  | 82.5               | 211     | 17.4  | 5559   | 917.4           |
| Temple   | 1655 (1369, 2090) | 3.3  | 51.1               | 509     | 26.1  | 9587   | 2076.5          |

817

818



819

Table 3: Lake zone area and corresponding eDNA concentrations.

| Site     | Pelagic area (ha) | Littoral area (ha) | Pelagic eDNA (copies/L) | Littoral eDNA (Copies/L) | Weighted Mean eDNA (Copies/L) |
|----------|-------------------|--------------------|-------------------------|--------------------------|-------------------------------|
| Cobb     | 1.0               | 1.3                | 253.8                   | 854.6                    | 592.2                         |
| Dog      | 8.5               | 3.1                | 3447.1                  | 9796.7                   | 5131.1                        |
| Helen    | 1.2               | 1.3                | 1342.4                  | 3514.4                   | 2445.9                        |
| Margaret | 14.4              | 3.6                | 791.9                   | 3034.1                   | 1240.4                        |
| McNair   | 0.7               | 1.0                | 2395.4                  | 3505.0                   | 3050.5                        |
| Mud      | 4.7               | 2.6                | 621.3                   | 2280.1                   | 1138.7                        |
| Olive    | 0.5               | 1.2                | 8084.6                  | 7684.7                   | 7805.1                        |
| Ross     | 4.6               | 2.0                | 790.5                   | 1209.8                   | 917.4                         |
| Temple   | 1.6               | 1.7                | 1940.8                  | 2200.2                   | 2076.5                        |
| Hidden   | 11.8              | 2.6                | 342.0                   | 2652.9                   | 847.2                         |

820

821

822 Table 4: Model results evaluating the relationship between eDNA particle concentration and  
823 density (fish/ha), biomass (kg/ha), allometrically scaled mass (ASM/ha), and CPUE.  
824

| Model   | F-value                | P-value | Adj. R <sup>2</sup> | Log Likelihood | AIC   | ΔAIC |
|---------|------------------------|---------|---------------------|----------------|-------|------|
| Density | 12.37 <sub>(1,7)</sub> | 0.010   | 0.59                | -77.78         | 161.6 | 5.7  |
| Biomass | 14.76 <sub>(1,7)</sub> | 0.006   | 0.63                | -77.26         | 160.5 | 4.6  |
| ASM     | 29.4 <sub>(1,7)</sub>  | 0.001   | 0.78                | -74.95         | 155.9 | -    |
| CPUE    | 1.92 <sub>(1,7)</sub>  | 0.208   | 0.10                | -81.27         | 168.5 | 12.6 |

825

826

827 **Figure Captions**

828

829 Figure 1: Lake size structure distributions (g) obtained from standardized gill net sets for the nine  
830 study lakes.

831

832 Figure 2: Correlation between weighted mean lake brook trout eDNA particle concentration and  
833 three metrics of abundance in the nine study lakes: (a) individual density (individuals/ha,  $R^2 =$   
834  $0.59$ ), (b) biomass density (kg/ha,  $R^2 = 0.63$ ), and (c) allometrically scaled mass (ASM/ha,  $R^2 =$   
835  $0.78$ ) ( $n = 9$ ).

836

837 Figure 3: Predicting allometrically scaled mass (ASM/ha) for Hidden Lake based on eDNA  
838 particle concentration. Black dots represent values for the nine study lakes, gray circle represents  
839 the ASM/ha point estimate for Hidden Lake. Error bars represent 95% prediction intervals ( $n =$   
840  $9$ ).

841

842 Figure 4: AIC values for models correlating brook trout eDNA and allometrically scaled mass  
843 (ASM), utilizing allometric scaling coefficients ranging from 0.00 (corresponding to individual  
844 density) to 1.0 (corresponding to biomass density). Horizontal black bars and dotted lines denote  
845 range of models with  $\Delta AIC < 2$  relative to the 'optimal' scaling coefficient (0.72).

846

847 Figure S1: Map of the nine study lakes located in Alberta and British Columbia, Canada.

848

849 Figure S2: Timing of sampling activities in 2018.

850

851 Figure S3: Relationship between catch-per-unit-effort (CPUE) of a large and small gill net and  
852 individual density (fish/ha) for the nine study lakes (adjusted  $R^2 < 0$ ) ( $n = 9$ ).

853

854 Figure S4: Relationship between brook trout eDNA particle concentration and catch-per-unit-  
855 effort (CPUE) of a large and small gill net for the nine study lakes ( $R^2 = 0.10$ ).

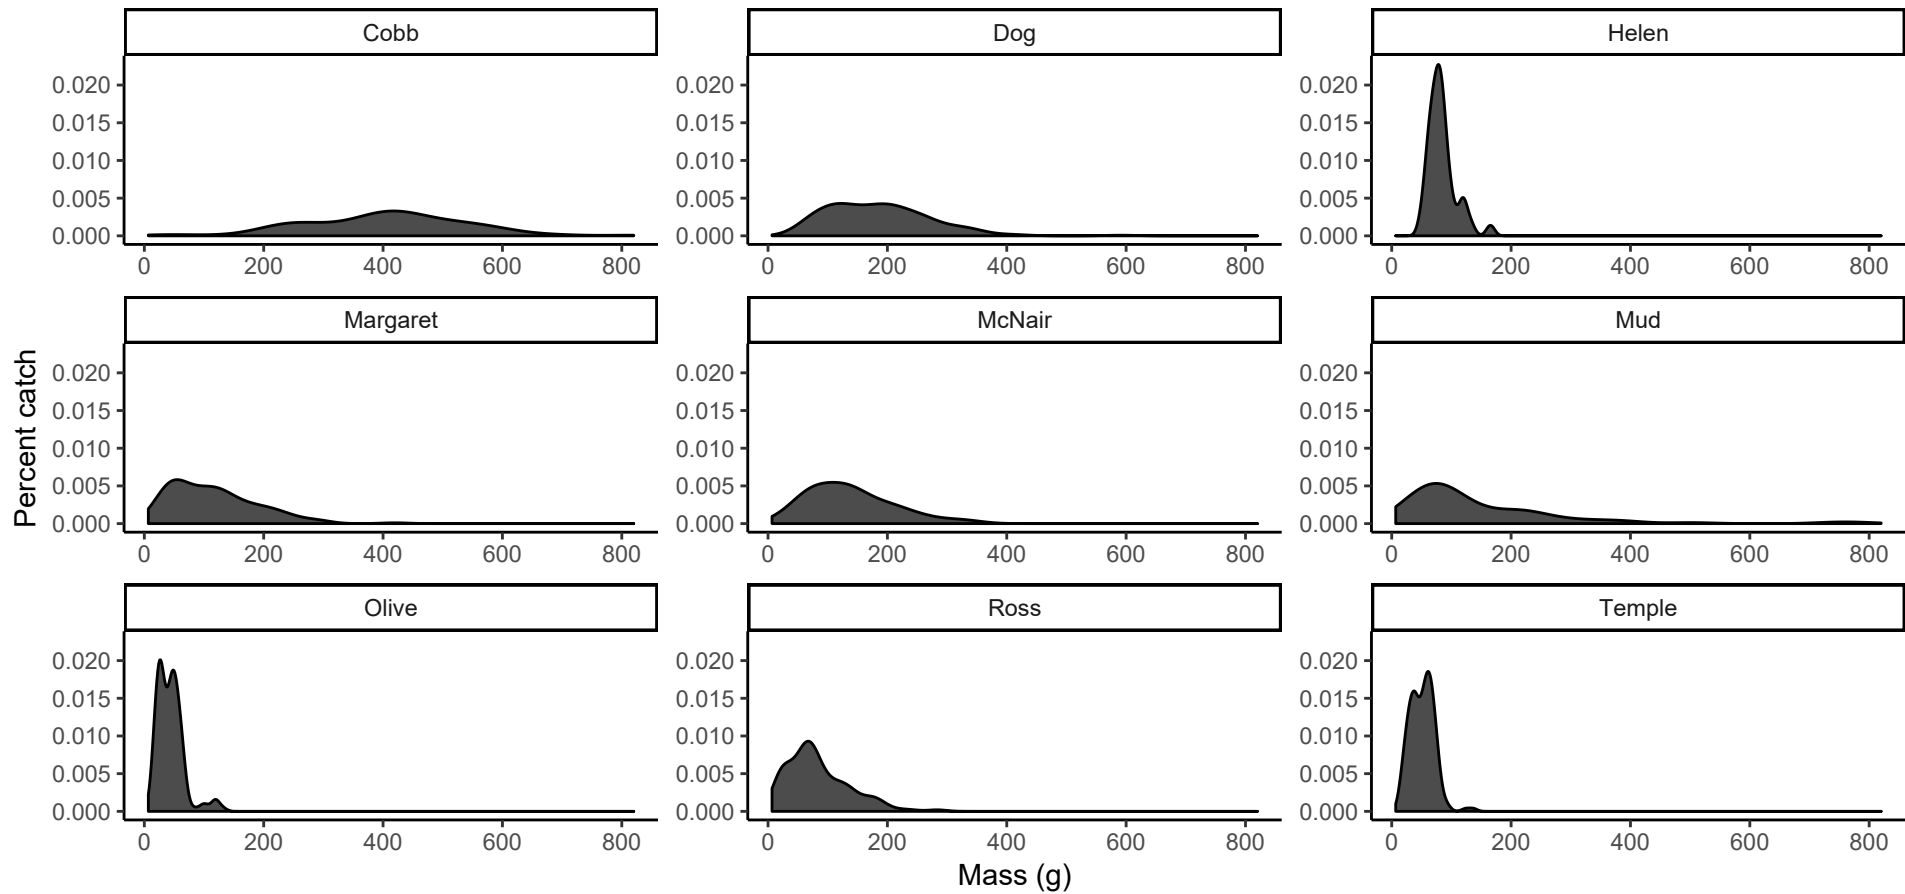

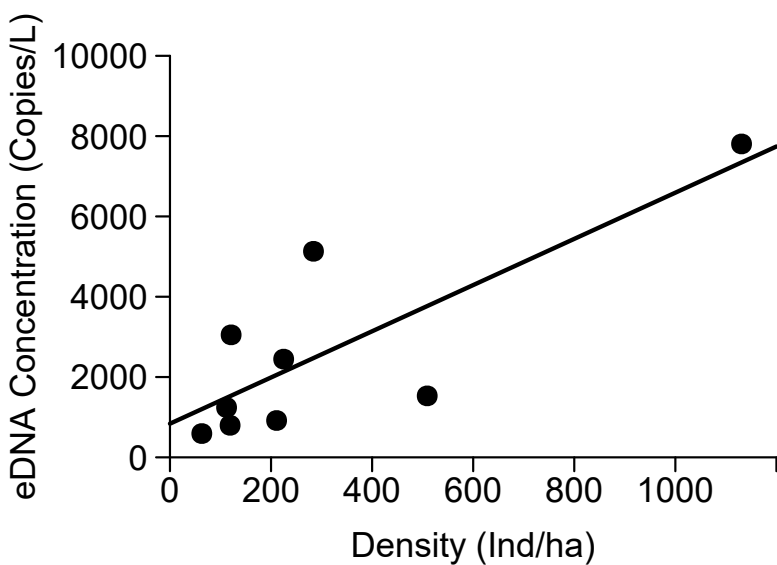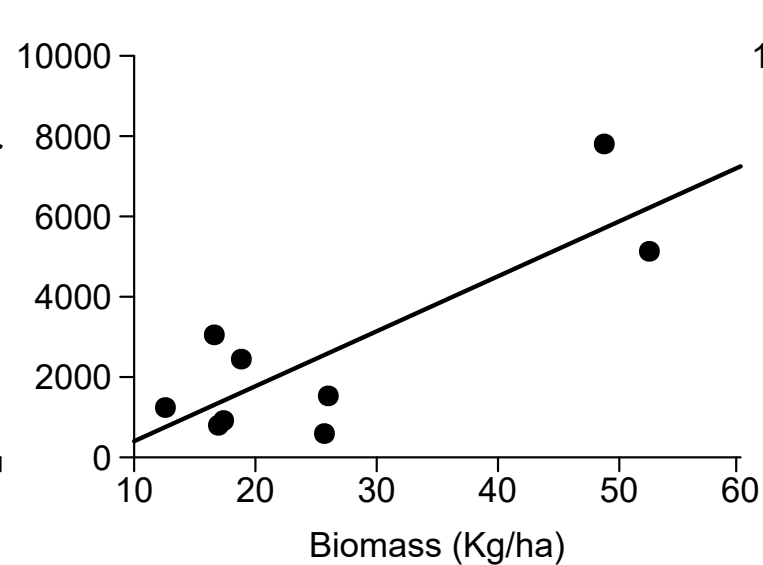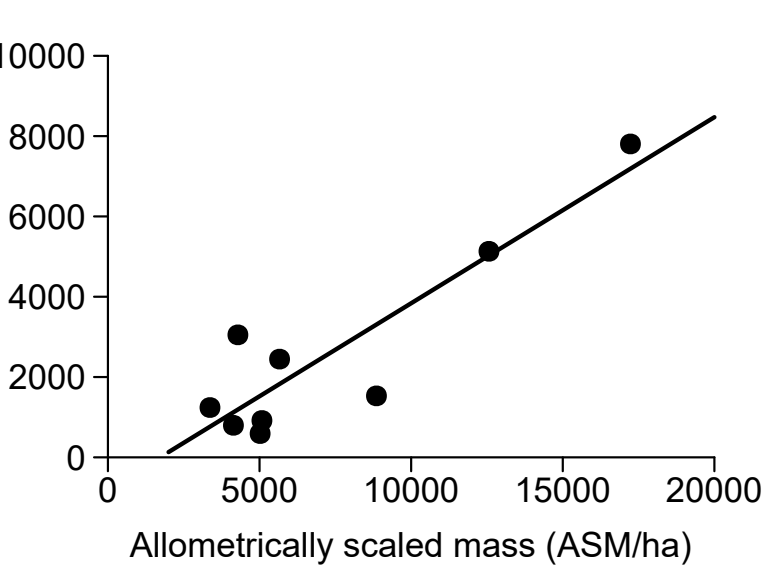

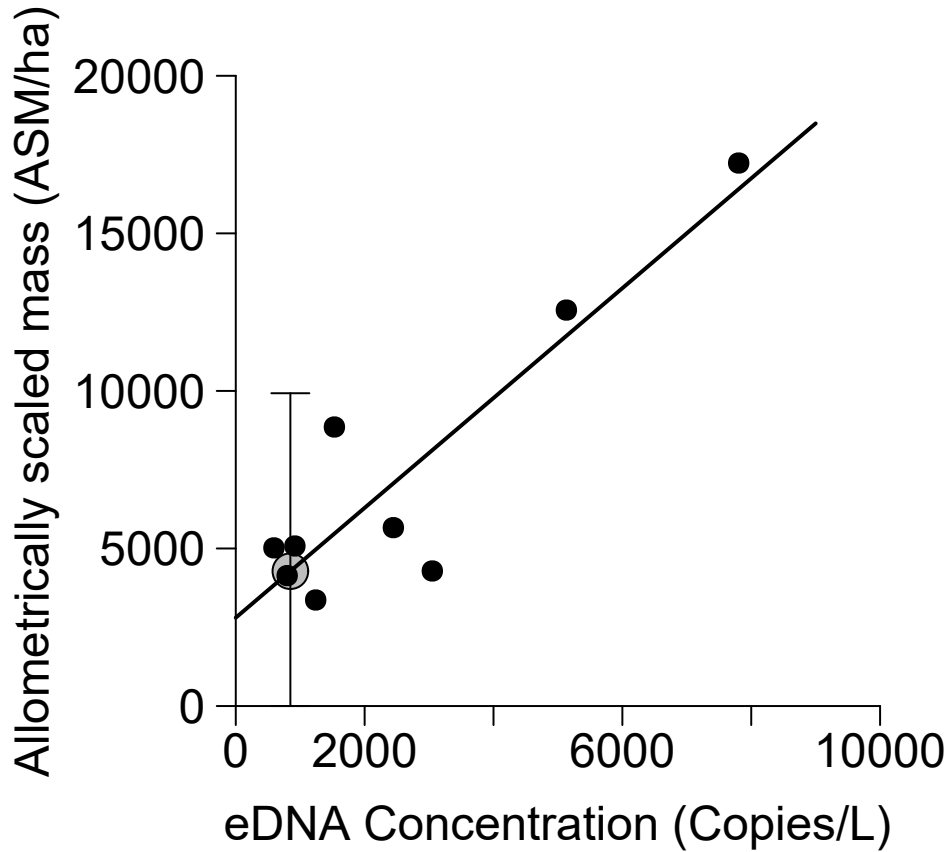

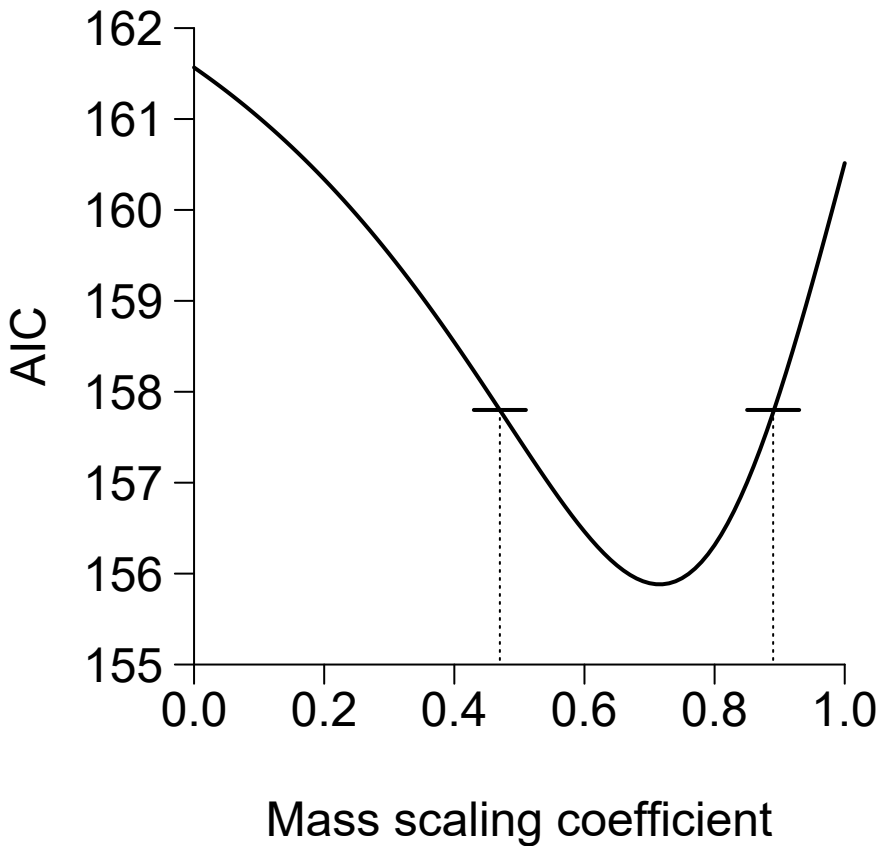

Source: https://www.biorxiv.org/content/biorxiv/early/2020/01/18/2020.01.18.908251.full.pdf
